# Supplementary material
Source: publisher figshare collection journal article supplement (https://asha.figshare.com/ndownloader/files/38221866)
Supplement: Supplementary file 1 [file 38221866]

## **Supplemental Material S1.** Case law references.

1. Albertson v Califano, No. Case No 77-1451. 453 F Supp. 610 (Dist.Court, Kansas 1978).
2. Albidrez v. Astrue, CASE NO. ED CV 12-00590 RZ (C.D. Cal. Feb. 19, 2013), No. CASE NO. ED CV 12-00590 RZ (Dist. Court Calif 2013).
3. Albino v. Berryhill, No. No. 18 Civ. 6514 (LGS)(HBP) (Dist. Court, SD New York 2019).
4. Alford v. Berryhill, No. CIV No. 16-0800 KBM (Dist. Court, D. New Mexico 2018).
5. Allen v. Standard Insurance Co, No. Case No. 10-CV-13217 (Dist. Court, ED Michigan 2011).
6. Altoonian v. Warren, No. Civil No. 5: 08-CV-11189 (Dist. Court, ED Michigan 2015).
7. Angerstein, Inc. v. Jankowski, 187 81 (Del: Superior Court 1962).
8. Anita Do v. Berryhill, No. Civil Action No. 3: 17-CV-1728-D (Dist. Court, ND Texas 2018).
9. Anna W. v. Saul, No. Cause No. 2: 19-CV-94-JVB (Dist. Court, ND Indiana 2020).
10. Azzam v. Baptist Healthcare Affiliates, Inc, No. No. 3: 10-CV-362, 855 653 (Dist. Court, WD Kentucky 2012).
11. Bach V Jaber, No. 0032757/2001, Motion Seq. No. 003, 004, Cal. No. 2007-001844T, 2007 34345 (NY: Supreme Court 2007).
12. Backman v. Colvin, No. Civil Action No. 4: 12-cv-1897-TER (Dist. Court, D. South Carolina 2014).
13. Bacon v. OHIO DEPARTMENT OF MEDICAID, No. No. CA2019-01-017, 2019 3226 (Ohio: Court of Appeals, 12th Appellate Dist. 2019).
14. Bacon v. OHIO DEPT. OF MEDICAID, No. Case No. CA2020-11-112, 2021 4537 (Ohio: Court of Appeals, 12th Appellate Dist. 2021).
15. Bailey v. Barnhart, No. No. 05-CV-4594, 473 822 (Dist. Court, ND Illinois 2006).
16. Bailey v. Barnhart, No. No. 05 C 4594, 473 842 (Dist. Court, ND Illinois 2006).
17. Bak v. HENRY FORD MACOMB HOSPITAL CORPORATION, No. No. 342483 (Mich: Court of Appeals 2019).
18. Barnes v. Astrue, No. Civil Action No. 2: 09 CV 51 (Dist. Court, ND West Virginia 2010).
19. Barnett v. DL Bromwell, Inc, No. Record No. 1033-86-4, 358 767 (Va: Court of Appeals 1987).
20. Barnett v. DL. BROMWELL, INC, No. Record No. 1033-86-4, 366 271 (Va: Court of Appeals 1988).
21. Barrett Business Service, Inc. v. Edge, No. CA No. N19A-11-011 DCS (Del: Superior Court 2020).
22. Barton v. Las Cositas, No. No. 7758, 694 1377 (NM: Court of Appeals 1984).
23. Beckwith v. Colvin, No. No. 13-CV-1095.(MAD/CFH) (Dist. Court, ND New York 2015).
24. Behles v. Chicago Transit Authority, No. Gen. No. 45,417, 104 635 (Ill: Appellate Court 1952).
25. Bell v. TOWER MANAGEMENT SERVICE, LP, No. Civil Action No.: 07-CV-5305 (FLW) (Dist. Court, D. New Jersey 2008).

26. Bellinger v. Astrue, No. Case No. 1: 10CV39MLM (Dist. Court, ED Missouri 2011).
27. Bello v. Bello, 198 73 (Pa: Superior Court 1962).
28. Bennett v. COMMISSIONER, SOCIAL SECURITY ADMINISTRATION, No. Case No. 3: 14-cv-01577-HGD (Dist. Court, ND Alabama 2016).
29. Bentley v. Berryhill, No. Civil No. 1: 17cv230 (Dist. Court, ND Indiana 2018).
30. Bilyeu v. Cowgill, No. No. B213939 (Cal: Court of Appeal, 2nd Appellate Dist., 3rd Div. 2011).
31. Birdsley Trucking Co. v. Industrial Comm'n, No. No. 3-89-0218WC, 548 772 (Ill: Appellate Court, 3rd Dist. 1989).
32. Bland v. Dush, No. Case No. 10-11046-BC (Dist. Court, ED Michigan 2011).
33. Blincoe v. Luessenhop, No. Civ. A. No. 86-341, 669 513 (Dist. Court, Dist. of Columbia 1987).
34. Bohannon v. Walmart Stores, Inc, No. No. CA 07-862, 279 502 (Ark: Court of Appeals 2008).
35. Bowen v. Commissioner of Social Security, No. Case No. 5: 15-cv-00117 (Dist. Court, D. Vermont 2015).
36. Bowman v. Illinois Cent. R. Co, No. Gen. No. 46,705, 132 558 (Ill: Appellate Court, 1st Dist., 1st Div. 1956).
37. Bowman v. Illinois Central RR Co, No. No. 34066, 142 104 (Ill: Supreme Court 1957).
38. Bowman v. Lemon, 154 317 (1926).
39. Bradshaw v United States, No. No. 618-84C (US Claims Court 1988).
40. Bressler v. YOGURT, 573 562 (Pa: Supreme Court 1990).
41. BRETT C. v. Saul, No. No. 18CV50134 (Dist. Court, ND Illinois 2019).
42. Brown v. McGinnis, No. No. 98-CV-4456 (JG), 62 855 (Dist. Court, ED New York 1999).
43. Bryant v. Turner, No. No. 10757, 431 121 (Utah: Supreme Court 1967).
44. Bullock v. Astrue, No. Civil Action No. 11-90-GWU (Dist. Court, ED Kentucky 2011).
45. Burnett v. Commissioner, No. Docket No. 91655, 23 1917 (Tax Court 1964).
46. Butler v. The Burlington Northern, No. No. WD 61675, 119 620 (Mo: Court of Appeals, Western Dist. 2003).
47. California Notion & Toy Co. v. Industrial Accident Commission, 210 524 (1922).
48. CATHERINE R. v. Saul, No. Case No. 6: 19-cv-232-SI (Dist. Court, D. Oregon 2020).
49. Chaudhry v. AMAZON. COM. DEDC, LLC, No. No. 18-1849 (Court of Appeals, 7th Circuit 2019).
50. Cheak v. COMMONWEALTH, DEPT. OF MENTAL HEALTH, 413 903 (Ky: Court of Appeals 1967).
51. Christopher T. v. Commissioner of Social Security, No. Civil Action No. 3: 18-CV-975 (DEP) (Dist. Court, ND New York 2019).
52. Ciara H. v. Saul, No. No. 18 C 2741 (Dist. Court, ND Illinois 2019).
53. Clarke v. TVC LAB INC, 54 675 (NY: Appellate Div., 1st Dept. 1976).
54. Clemens v. ESPER, No. No. 16-cv-467-wmc (Dist. Court, WD Wisconsin 2018).
55. Cleveland V Policy Management Systems Corp, No. Civil No. 3:95-CV-2140-H (Dist. Court, Dallas TX 2000).

56. Cleveland v. Policy Management Systems Corp, No. No. 96-11247, 120 513 (Court of Appeals, 5th Circuit 1997).
57. Clubb v. Secretary of Health and Human Services, No. No. 15-891V (Court of Federal Claims 2017).
58. Cockrell v Industrial Comm, No. LEXIS 1055; 11 Ohio L. Abs. 423 (Court of Appeals, Ohio 1931).
59. Coldiron v Astrue, No. Civil Action No. 08-cv-00625-RPM (Dist. Court Collorado 2009).
60. Collins v. Gaetz, No. No. 09-2212, 612 574 (Court of Appeals, 7th Circuit 2010).
61. Collins v. Government of Virgin Islands, No. Civ. No. 27-1963, 236 441 (Dist. Court, D. Virgin Islands 1964).
62. COLON-HERNANDEZ v. Commissioner of Social Security, No. Civil No. 17-1456 (ADC) (Dist. Court, D. Puerto Rico 2018).
63. COLON-HERNANDEZ v. Commissioner of Social Security, No. Civil No. 17-1456 (ADC) (Dist. Court, D. Puerto Rico 2018).
64. COM. ex rel. CUMMINS v. Price, 421 396 (Pa: Supreme Court 1966).
65. Commonwealth v. Scott, No. No. 1238 WDA 2016 (Pa: Superior Court 2018).
66. Conn v. United States, No. No. 2: 05cv1173 (Dist. Court, WD Pennsylvania 2009).
67. Costa v. COLUMBIA PRESBYT. MED. CTR, No. Docket No. 102175/09, Motion Seq. No. 02, 2012 32409 (NY: Supreme Court 2012).
68. Couret-Rios v. FIRE & POL. EMP. RET. SYS, No. No. 36, Sept. Term, 2019, 227 637 (Md: Court of Appeals 2020).
69. Cowan v. Inland Waterways Corp, No. No. 2223, 121 683 (Dist. Court, Illinois 1954).
70. Cox v. Colvin, No. No. CIV 12-899 LFG (Dist. Court, D. New Mexico 2013).
71. Cox v. St. Josephs Hosp, No. No. SC09-1771, 71 795 (Fla: Supreme Court 2011).
72. Cox v. United States Coal & Coke Co, 92 559 (1917).
73. Crawford v. William Beaumont Hospital, No. No. 298914 (Mich: Court of Appeals 2012).
74. Cronin v. Harris, No. No. 022697-10, Mot. Seq. No. 1, 2011 30615 (NY: Supreme Court 2011).
75. Cumerland County Hospital System, Inc. v. Price, No. No. 5: 15-CV-317-D (Dist. Court, North Carolina 2017).
76. Cummings v. Berryhill, No. Civil Action No. H-16-1101 (Dist. Court, SD Texas 2017).
77. Dahan v. UHS of Bethesda, Inc, No. No. 1-97-0462, 692 1303 (Ill: Appellate Court, 1st Dist., 2nd Div. 1998).
78. Dang v. Eslinger, No. Case No. 6: 14-cv-37-Orl-31TBS (Dist. Court, MD Florida 2014).
79. Day v. Colvin, No. Case No. 1: 15-cv-00479-SKO (Dist. Court, ED California 2016).
80. Day v. Sheffield, No. 0008556/2004, Mot. Seq.# 001-MD, 2007 33677 (NY: Supreme Court 2007).
81. Delaine G. v. Saul, No. Case No. C20-5807-MAT (Dist. Court, WD Washington 2021).
82. Delancy v. Liberty Life Assurance Company of Boston, No. Case No. SACV 15-02022-CJC (KESx) (Dist. Court, CD California 2017).

83. DeMarco v. Heckler, No. Civ. A. No. 83-1892, 616 644 (Dist. Court, ED Pennsylvania 1985).
84. Devon L. v. Clear Creek Independent School District, No. Civil Action No. H-15-1373 (Dist. Court, SD Texas 2016).
85. DIGIANTOMASSO v. Saul, No. Case No. CIV-19-631-C (Dist. Court, WD Oklahoma 2020).
86. Dillon v. Akron City Hosp, No. No. 87-1402, 37 244 (Ohio: Supreme Court 1988).
87. DIXON-JONES v. Secretary of Health and Human Services, No. No. 14-934V (Court of Federal Claims 2020).
88. Dodds v Waxer, No. C036399 (Court of Appeal, California 2002).
89. Doe v. CASE WESTERN RESERVE UNIVERSITY, No. No. 1: 17 CV 414 (Dist. Court, ND Ohio 2017).
90. Dohoney v Prudential Insurance Company of America, No. No. 82-1179 (Court of Appeals Sixth Circuit 1983).
91. Dunn v. Dunn, No. No. 73-182, 503 168 (Ark: Supreme Court 1973).
92. Dupas v. City of New Orleans, No. No. 8060, 361 911 (La: Court of Appeals, 4th Circuit 1978).
93. Eisenberg v Gagnon, No. C.A. No. 82-5051 (Dist. Court, East District PA 1986).
94. Eisenberg v. Gagnon, No. No. 84-1214, 766 770 (Court of Appeals, 3rd Circuit 1985).
95. Ellis v. Secretary, Department of Corrections, No. Case No. 6: 18-cv-1978-Orl-28DCI (Dist. Court, MD Florida 2020).
96. Ellsworth v. Berryhill, No. No. 15 CV 10268 (Dist. Court, ND Illinois 2017).
97. Embry v. SOCIAL SECURITY ADMINISTRATION, COMMISSIONER, No. Case No. 2: 18-cv-02116-SGC (Dist. Court, ND Alabama 2019).
98. English v. Colvin, No. Case No. 4: 14-cv-01841-GBC (Dist. Court, MD Pennsylvania 2016).
99. Evans v. Apfel, No. CV-98-6185-ST (Dist. Court, Oregon 1999).
100. Ezzell v. Miranne, No. No. 11-CA-228, 84 641 (La: Court of Appeals, 5th Circuit 2011).
101. Fabian, et ux. v. Matzko, et al, 236 267 (Pa: Superior Court 1975).
102. Farley v. Southeastern Pa. Transp. Auth, 421 346 (Pa: Superior Court 1980).
103. Feger v. Feger, No. No. 2D02-1265, 850 611 (Fla: Dist. Court of Appeals, 2nd Dist. 2003).
104. Figueroa v. Commissioner of Correction, No. No. AC 42140 (Conn: Appellate Court 2021).
105. FIRE AND POLICE EMPLOYEE'S RETIREMENT SYSTEM v. COURET-RIOS, No. No. 02493, September Term, 2017 (Md: Court of Special Appeals 2019).
106. FIRE AND POLICE EMPLOYEES'RETIREMENT SYSTEM v. COURET-RIOS, No. No. 02493 September Term, 2017 (Md: Court of Special Appeals 2019).
107. Folsom v. Magna Manufacturing Co, 82 434 (NJ: Appellate Div. 1951).
108. Forslund v. NATL. TECH. AND ENG. SOLS. OF SANDIA, No. No. 1: 20-cv-00171- WJ-SCY, 516 1285 (Dist. Court, D. New Mexico 2021).
109. Framm v. Wilson, No. No. 1655, September Term, 2015 (Md: Court of Special Appeals 2017).

110. Freeman v. Bell, No. No. 13692, 366 197 (La: Court of Appeals, 2nd Circuit 1978).
111. Frey v. Goebert, No. No. 4916, 474 537 (Haw: Supreme Court 1970).
112. Gagliardi v. Bowen, No. Civil Action No. 87-2133 JCL (Dist. Court, NJ 1988).
113. Galloway v. FEDERAL TORT CLAIMS ACT, No. Case No. 4: 17-CV-1314 (Dist. Court, ND Ohio 2019).
114. Gant v. United Fruit Company, No. No. 2959, 225 578 (Dist. Court, SD Alabama 1963).
115. Garland v. Colvin, No. No. CV 13-119-TUC-CRP (Dist. Court, D. Arizona 2014).
116. Garren C. v. Commissioner of Social Security, No. Civ. No. 1: 18-cv-00860-MC (Dist. Court, D. Oregon 2019).
117. Garrison Nursing Home and Rehabilitation Center v. Demings, No. No. 12-15-00189-CV (Tex: Court of Appeals, 12th Dist. 2016).
118. Gartmann v. SECRETARY OF US DEPT. OF HEALTH, No. No. CV 84-2638, 633 671 (Dist. Court, ED New York 1986).
119. General Motors Corp. v. Industrial Comm'n, No. No. 4-87-0745WC, 534 992 (Ill: Appellate Court, 4th Dist. 1989).
120. Glazier v. Sprague SS Co, No. Civ. A. No. 10541, 103 157 (Dist. Court, ED Pennsylvania 1952).
121. Gonzales v. State, No. No. 1411-98, 994 170 (Tex: Court of Criminal Appeals 1999).
122. Gotcher v. Berryhill, No. Case No. 15-cv-609-TLW (Dist. Court, ND Oklahoma 2017).
123. Gracie v. Commissioner of Social Security, No. Case No. 19-cv-01916-RMI (Dist. Court, ND California 2020).
124. Grant v. Astrue, No. Civil Action No. 10-10661-GAO (Dist. Court, D. Massachusetts 2011).
125. Grantham v. Cherry Hosp, No. No. 8910IC867, 389 822 (NC: Court of Appeals 1990).
126. Gray v. AUTO-OWNERS INSURANCE GROUP, No. Case No. 18-13888 (Dist. Court, ED Michigan 2020).
127. Gregory v. Saul, No. C/A No. 1: 18-1834-MBS-SVH (Dist. Court, D. South Carolina 2019).
128. Greynolds v. Kurman, No. No. 16038, 91 389 (Ohio: Court of Appeals 1993).
129. Groeper v. Sullivan, No. No. 90-1645, 932 1234 (Court of Appeals, 8th Circuit 1991).
130. Gwendolyn L. v. Berryhill, No. No. 1: 18-cv-00272-JDL (Dist. Court, D. Maine 2019).
131. Hall v. Tomball Nursing Center, Inc, No. No. 14-95-0045-CV, 926 617 (Tex: Court of Appeals 1996).
132. Hamilton v. Astrue, No. Case No. CIV-12-167-M (Dist. Court, WD Oklahoma 2013).
133. Hamilton v. Principi, No. No. 99-351 (Crt of Appeals Veterans Claims 2001).
134. Handau v. Saul, No. No. 3: 19 CV 616 (RMS) (Dist. Court, D. Connecticut 2020).
135. Hannon v Harris, No. No. C 80 0676 WTS (Dist. Court, CA 1980).
136. Harbec v. North Country Hospital & Health Practices, No. Case No. 5: 19-cv-61 (Dist. Court, D. Vermont 2021).
137. Hardy v. State, No. No. 87469, 716 761 (Fla: Supreme Court 1998).

138. Hargett v. Correctional Medical Services Inc, No. No. 1: 11-cv-1316-JMS-DKL (Dist. Court, SD Indiana 2014).
139. Hargett v. Correctional Medical Services, Inc, No. Cause No. 1: 11-cv-1316-JMS- DKL (Dist. Court, SD Indiana 2012).
140. Hargett v. Correctional Medical Services, Inc, No. No. 1: 11-1316-JMS-DKL (Dist. Court, SD Indiana 2012).
141. Hart v. City of Johnstown, No. No. 6: 16-CV-619 (NAM/TWD) (Dist. Court, ND New York 2019).
142. Harvey v. TAMBI, No. Case No. 1: 12-cv-3037 (Dist. Court, ND Ohio 2015).
143. Hawaii Stevedores, Incorporated v. Ogawa, No. No. 09-73041 (Court of Appeals, 9th Circuit 2010).
144. Hawkins v. Colvin, No. Action No. 4: 13cv15 (Dist. Court, ED Virginia 2013).
145. Henry V. Astrue, No. CIVIL ACTION NO. 07-1708 (Dist. Court Louisiana 2009).
146. Henry v. Astrue 141 Soc. Sec. Rep. Service 255 (Dist. Court 2009).
147. Hiler v. Brown, No. No. 98-5014, 177 542 (Court of Appeals, 6th Circuit 1999).
148. Hill v. Colvin, No. Civil Action No. DKC 15-1027 (Dist. Court, D. Maryland 2016).
149. Hill v. Sacred Heart Medical Center, No. No. 25583-2-III, 177 1152 (Wash: Court of Appeals, 3rd Div. 2008).
150. Hoffman v. Colvin, No. Civil No. 3: 12-cv-03008-JRM (Dist. Court, WD Arkansas 2013).
151. Holland v. Cayuga Medical Center at Ithaca, Inc, No. 532192, 195 1292 (NY: Appellate Div., 3rd Dept. 2021).
152. Holmes v. TEXAS A&M UNIVERSITY, No. No. 96-50528, 138 168 (Court of Appeals, 5th Circuit 1998).
153. Howcroft v. Howcroft, No. No. 2010 CA 25, 949 46 (Ohio: Court of Appeals, 5th Appellate Dist. 2010).
154. Hudgins v. Handy, No. Record No. 1515-96-3 (Court of Appeals, VA 1997).
155. Huey v. Colvin, No. Civil Action No. 3: 14-CV-2861-P (BH) (Dist. Court, ND Texas 2015).
156. Hummel v. Rosemeyer, No. No. 06-2711, 564 290 (Court of Appeals, 3rd Circuit 2009).
157. Hussey v. Chase Manhattan Bank, No. CIVIL ACTION NO. 02-7099 (Dist. Court, Penn 2004).
158. Hussey v. Chase Manhattan Bank, No. Civil Action No. 02-7099 (Dist. Court, ED Pennsylvania 2005).
159. IN RE MATTER OF THE LICENCE OF ACKERMAN, No. No. A-4389-15T1 (NJ: Appellate Div. 2017).
160. In re McDonough, No. No. SJC-10609, 930 1279 (Mass: Supreme Judicial Court 2010).
161. IN RE THE MATTER OF MARQUEZ, No. No. 1 CA-CV 10-0085 (Ariz: Court of Appeals, 1st Div., Dept. E 2011).
162. In the matter of claim of Price v. Hudson Correctional Facility, 24 820 (NY: Appellate Div., 3rd Dept. 2005).
163. IN THE MATTER OF INVOLUNTARY TERMINATION OF PARENT-CHILD RELATIONSHIP OF SL, No. Court of Appeals Case No. 19A-JT-2459 (Ind: Court of Appeals 2020).

164. In the matter of Jesse M Merton, No. No. 4817, 766 (Supreme Court, Nevada 1964).
165. IVAN P. v. Saul, No. Case No. 2: 19-cv-00486-AFM (Dist. Court, CD California 2020).
166. Jablonski v. TRAVELERS COMPANIES, INC, No. No. 16-16474, Non-Argument Calendar (Court of Appeals, 11th Circuit 2018).
167. Jenkins v. Saul, No. No. 3: 20cv154-MPM-JMV (Dist. Court, ND Mississippi 2021).
168. Johnson v. Astrue, No. Civil Action No. 09-023-LPS (Dist. Court, D. Delaware 2011).
169. Johnson v. Baltimore & OR Co, No. No. 71 H 151 (Dist. Court, IND 1974).
170. Johnson v. Berryhill, No. No. 6: 15-CV-02284-JO (Dist. Court, D. Oregon 2017).
171. Jones v. Astrue, No. Civil Action No. H-07-4435 (Dist. Court, SD Texas 2008).
172. Jones v. University Hospitals of Cleveland, No. NO. 65792 (Court of Appeals, OH 1994).
173. Jones-Booker v. US, No. Civil No. 97CV10616-PBS, 16 52 (Dist. Court, D. Massachusetts 1998).
174. Jordan v. Commissioner of Social Security, No. Civil Action No. 4: 15-CV-026-SAA (Dist. Court, ND Mississippi 2015).
175. Kari A. v. COMMISSIONER OF SOCIAL SECURITY ADMINISTRATION, No. No. 2: 17-CV-00322-SAB (Dist. Court, ED Washington 2018).
176. Karlin v. H&L Maintenance, No. 97 Cv. 2551 (Dist. Court NY 1997).
177. Kater v. United Ins. Co. of America, No. Gen. No. 10,256, 165 74 (Ill: Appellate Court, 3rd Dist. 1960).
178. Keatts v. Astrue, No. Cause No. 1: 07-CV-296 (Dist. Court, ND Indiana 2008).
179. Kevin S. v. COMMISSIONER, SOCIAL SECURITY ADMINISTRATION, No. Case No. 6: 17-cv-569-SI (Dist. Court, D. Oregon 2018).
180. Kidd v. COMMISSIONER, SOCIAL SECURITY ADMINISTRATION, No. Case No. 4: 20-cv-01628-ACA (Dist. Court, ND Alabama 2021).
181. Kinsey v. Kolber, No. No. 80-2723, 431 1316 (Ill: Appellate Court, 1st Dist. 1982).
182. Klejnot v. Cohen, No. CIVIL ACTION NO. MJG-00-3732 (Dist. Court MD 2001).
183. Klingbeil v. Truesdell, No. No. 37,638, 98 134 (Minn: Supreme Court 1959).
184. Kluever v. EVANGELICAL CONGREGATION, No. No. 87-0905, 422 874 (Wis: Court of Appeals 1988).
185. Kolpack v. Colvin, No. Civil Action No. 3: 13-CV-2257-FLW (Dist. Court, D. New Jersey 2014).
186. Kubera v. Bartholomew, No. 1025 CA 17-01748, 167 1477 (NY: Appellate Div., 4th Dept. 2018).
187. Lackey v. State, No. No. 61094, 638 439 (Tex: Court of Criminal Appeals 1982).
188. Lacoax v. Astrue, No. No. 1:06-0067 (Dist. Court, Tenn 2010).
189. Land v. Washington County, Minn, No. No. 99-3203, 243 1093 (Court of Appeals, 8th Circuit 2001).
190. Landes v. Heckler, No. No. L 83-14 (Dist. Court, Ind 1984).
191. Lashley v. Secretary of Health and Human Services, No. No. 82-5163, 708 1048 (Court of Appeals, 6th Circuit 1983).

192. Lasley v. Georgetown University, No. No. 95-SP-1341, 688 1381 (DC: Court of Appeals 1997).
193. Lassiter v. Berryhill, No. Civil Action No. 6: 17-1733-CMC-KFM (Dist. Court, D. South Carolina 2018).
194. Laux v. Berryhill, No. Case No. 1: 17CV1098 (Dist. Court, ND Ohio 2018).
195. LE BOW v. Saul, No. No. CV 19-758 MV/CG (Dist. Court, D. New Mexico 2020).
196. Leith v. Horgan, 100 175 (NJ: Supreme Court 1953).
197. Lembeck v. Brady, No. Gen. No. 66-21, 222 704 (Ill: Appellate Court, 3rd Dist. 1966).
198. Logan v. Califano, No. Civil Action No. 78-0106(D) (Dist. Court, VA 1979).
199. Long M. v. Berryhill, No. Case No. 18-cv-862 (ECW) (Dist. Court, Minnesota 2019).
200. Longley v. Berryhill, No. Case No. 16-cv-2071 (TNL) (Dist. Court, Minnesota 2017).
201. Louie v. BP Exploration (Alaska), Inc, No. No. S-15120, 327 204 (Alaska: Supreme Court 2014).
202. Mackie v. United States, 172 393 (1965).
203. Macko v. Raritan Valley Farms, Inc., No. 35 A.2d 872 (Supreme Court, NJ 1944).
204. Manzi v. Saul, No. Case No. EDCV 20-01292-JEM (Dist. Court, CD California 2021).
205. MARCHEGIANI v. Aetna Life Insurance Co, No. No. 3: 14-CV-00568 (Dist. Court, MD Pennsylvania 2016).
206. Marlow v. Brown, No. No. 90-956 (Court of Veterans Appeals 1993).
207. Martin v. Colvin, No. Case No. 1: 16-cv-205-JCG (Dist. Court, SD Mississippi 2017).
208. Martin v. UNIVERSITY HOSPITAL NEWARK, No. Docket No. A-0052-19T1 (NJ: Appellate Div. 2020).
209. Matter of Altschuller V. Bressler, No. 3943, 289 463 (1943).
210. MATTER OF ELBAUM v. J & J INTERIOR DECORATORS, INC, 2 922 (NY: Appellate Div., 3rd Dept. 1956).
211. Matter of Fernandez v. Orioles, 62 1115 (NY: Appellate Div., 3rd Dept. 1978).
212. MATTER OF FERRIN v. Genesee Brewing Co, 281 790 (NY: Appellate Div., 3rd Dept. 1953).
213. MATTER OF HULBERT v. CORTLAND COUNTY SHERIFF'S DEPARTMENT, No. 504884, 69 987 (NY: Appellate Div., 3rd Dept. 2010).
214. MATTER OF KIENER v. CLINTONAIRE HOTEL, 24 1036 (NY: Appellate Div., 3rd Dept. 1965).
215. MATTER OF KIRSNER v. K. & G. AUTO PARTS, INC, 281 788 (NY: Appellate Div., 3rd Dept. 1953).
216. MATTER OF LAGOWSKI v. Whalen, 270 827 (NY: Appellate Div., 4th Dept. 2000).
217. MATTER OF RIGGIO v. PLANET CONSTR. CO, 24 1069 (NY: Appellate Div., 3rd Dept. 1965).
218. MATTHEW SF v. Saul, No. Case No. 4: 19 CV 1706 (JMB) (Dist. Court, ED Missouri 2020).
219. Matthews v. State Compensation Ins. Fund, No. No. 99-099, 985 741 (Mont: Supreme Court 1999).
220. Mauppin v. State, No. No. CR 91-107, 831 104 (Ark: Supreme Court 1992).



221. May v. Eppert Oil Company, No. No. 217144 (Appeals Court, Michigan 2000).
222. Maynard v. Board of Trustees, 549 1213 (NJ: Supreme Court 1988).
223. Mazzarino v. Wausau Insurance Co, No. DIA Board No. 01305893 (Industrial Accidents, Mass 2001).
224. McCoy v. Cataldo, No. Eq. No. 2728, 158 271 (RI: Supreme Court 1960).
225. McCullough v. Berryhill, No. Case No. 16-cv-00625-BLF (Dist. Court, ND California 2017).
226. McDonald v. Standard Gas Engine Co, No. Civ. No. 9457, 8 464 (Cal: Court of Appeal, 1st Appellate Dist., 2nd Div. 1935).
227. McGuire v Barnhart, No. 8:01CV59 (Dist. Court, Nebraska 2001).
228. McInerney v. Rensselaer Polytechnic Institute, No. No. 1: 05-CV-1267, 688 117 (Dist. Court, ND New York 2010).
229. Meyer v. UNUM LIFE INS. CO. OF AMERICA, No. Civil Action No. 12-1134-KHV, 96 1234 (Dist. Court, D. Kansas 2015).
230. Miller v. Riddle Memorial Hospital, No. 98-392, 1998 272167 (1998).
231. Mincy v. Berryhill, No. Case No. 1: 18CV01400 (Dist. Court, ND Ohio 2019).
232. MONIQUE B. v. Saul, No. Case No. 19cv0945-RBB (Dist. Court, SD California 2020).
233. Moore v. Colvin, No. Civil Action No. 5: 13-CV-153-BG ECF (Dist. Court, ND Texas 2014).
234. Morales v. Peake, No. NO. 07-1717 (Crt of Appeals for Veterans Claims 2009).
235. Moran v. Astrue, No. No. 11 C 8846 (Dist. Court, ND Illinois 2013).
236. Morris v. Ferriss, No. No. 95-CA-1790 thru 95-CA-1792, 669 1316 (La: Court of Appeals, 4th Circuit 1996).
237. Mulder v. Baker, No. No. 3: 09-CV-00610-PMP-WGC (Dist. Court, D. Nevada 2011).
238. Mulder v. Baker, No. No. 3: 09-CV-00610-PMP-WGC (Dist. Court, D. Nevada 2013).
239. Mulder v. GITTERE, No. Case No. 3: 09-cv-0610-JAD-WGC (Dist. Court, D. Nevada 2021).
240. Mulder v. McDaniel, No. No. 3: 09-CV-00610-PMP-RAM (Dist. Court, D. Nevada 2011).
241. Mullins v. Colvin, No. Case No. 3: 13cv00226 (Dist. Court, SD Ohio 2014).
242. Murad v. First Union Auto Finance, No. INDEX NO: 21722/98, MOTION SEQ. NO: 003 (Supreme Crt, NY 2001).
243. Murphy v. Berryhill, No. No. 16 C 2366 (Dist. Court, ND Illinois 2017).
244. Murphy v. Berryhill, No. No. 17-2017 (Court of Appeals, 7th Circuit 2018).
245. Murphy v. CALIFORNIA PHYSICIANS SERVICE, No. Case No. 14-cv-2581-PJH (Dist. Court, ND California 2017).
246. Murphy v. Colvin, No. No. 12 CV 3879 (Dist. Court, ND Illinois 2013).
247. MWASI v. CORCORAN STATE PRISON, No. Case No. 1: 13-cv-00695-AWI-JLT (PC) (Dist. Court, ED California 2014).
248. Nelsen v. Nelsen, No. No. A04-641 (Minn: Court of Appeals 2005).
249. Nelson v. TRANSGUARD INSURANCE COMPANY OF AMERICA, INC, No. No. 14-cv-862-bbc (Dist. Court, WD Wisconsin 2015).
250. O'Connell v Massanari, No. 99 Civ. 4987 (AGS) (Dist. Crt, NY 2001).
251. O'Connor v. Peake, No. NO. 07-0660 (Crt of Appeals for Veterans Claims 2008).

252. Orlowski v. Guido, No. Docket No. 10-16423, Mot. Seq. No. 001-MD, 2013 32752 (NY: Supreme Court 2013).
253. Ortiz v. Caplin, No. Docket No. 37976/2008, Motion Sequence No. 002 MD, 003 MD, 004 MD, 2018 33133 (NY: Supreme Court 2018).
254. Padilla v. Berryhill, No. Civ. No. 17 329 GJF (Dist. Court, D. New Mexico 2018).
255. Parker v. Gelber, No. Case No. 6: 18-cv-01611-MK (Dist. Court, D. Oregon 2019).
256. Paton v. Saul, No. Civil Action No. 19-4818 (Dist. Court, ED Pennsylvania 2020).
257. Peabody Coal Co. v. Vigna, No. No. 93-2346, 22 1388 (Court of Appeals, 7th Circuit 1994).
258. Peabody Coal Co. v. Vigna, No. No. 93-2346, 22 1388 (Court of Appeals, 7th Circuit 1994).
259. People v. Altoonian, No. Docket No. 134681, 741 314 (Mich: Supreme Court 2007).
260. People v. Artz, No. No. 233471 (Crt of Appeals, Michigan 2003).
261. People v. Baker, No. No. C080869 (Cal: Court of Appeal, 3rd Appellate Dist. 2020).
262. People v. Brown, No. E034638 (Crt of Appeal, CA 2005).
263. People v. Brown, 16 1039 (NY: Supreme Court 2007).
264. People v. Collins, No. No. 1-04-0267 (Crt of Appeals, Illinois 2006).
265. People v. Comfort, No. No. 325330 (Mich: Court of Appeals 2016).
266. People v. Deary-Smith, No. No. C080821 (Cal: Court of Appeal, 3rd Appellate Dist. 2019).
267. People v. Duong, No. H022008, H023264 (Crt Appeal, CA 2002).
268. People v. Phillips, No. 5187/04, 2007 50119 (NY: Supreme Court 2007).
269. People v. Phillips, No. No. 41, 2011 2438 (NY: Court of Appeals 2011).
270. People v. Schaffer, 657 1305 (NY: Court of Appeals 1995).
271. People v. Winans, No. No. A148530 (Cal: Court of Appeal, 1st Appellate Dist., 3rd Div. 2017).
272. Perez v. Live Nation Worldwide, Inc, No. Docket No. 158373/2013, Motion Seq. No. 010, 2020 32419 (NY: Supreme Court 2020).
273. Permanente Med. Group v. WORKERS'COMP. APP. BD, No. Docket No. 39424, 69 770 (Cal: Court of Appeal, 1st Appellate Dist., 1st Div. 1977).
274. Perry v. Brown, No. No. 19-1683, 950 410 (Court of Appeals, 7th Circuit 2020).
275. Peterson v. Colvin, No. No. 4: 12CV3098 (Dist. Court, D. Nebraska 2013).
276. Pope v. Colvin, No. Civil Action No. 2: 14cv00039 (Dist. Court, WD Virginia 2016).
277. Potter v. Colvin, No. Civil Action No. 14-cv-01783-CBS (Dist. Court, D. Colorado 2015).
278. Prelutsky v. Greater Georgia Life Insurance Company, No. No. 1: 15-cv-628-WSD (Dist. Court, ND Georgia 2016).
279. Preston v. Berryhill, No. No. 5: 16-CV-05097-VLD (Dist. Court, D. South Dakota 2018).
280. Price v. Astrue, No. CIVIL ACTION NUMBER: 09-3511 SECTION: "R"(5) (Dist. Crt, Louisiana 2010).
281. Pringle v. State, No. NO. 14-18-00445-CR (Tex: Court of Appeals, 14th Dist. 2020).

282. R v WH, No. No. CNJ 5770 (Superior Court of Justice 2006).
283. Rabb v. School Board of Orange County, No. Case No. 6: 12-cv-1562-Orl-28KRS (Dist. Court, MD Florida 2014).
284. Rabb v. THE SCHOOL BOARD OF ORANGE COUNTY, No. No. 14-11287, Non- Argument Calendar (Court of Appeals, 11th Circuit 2014).
285. Raby v. Colvin, No. No. 2: 15-CV-81 (Dist. Court, ED Tennessee 2016).
286. Ragusa v. Colvin, No. Civil Action No. 3: 12-CV-1659 (Dist. Court, MD Pennsylvania 2014).
287. Ramdeen v. Prudential Insurance Company, No. Case No. 6: 15-cv-139-Orl-28TBS (Dist. Court, MD Florida 2016).
288. Rangel v. Colvin, No. No. CV 14-3430 -DOC (E) (Dist. Court, CD California 2014).
289. Reed v. Barnhart, No. No. 01 C 6000 (Dist. Court, ND Illinois 2004).
290. Reed v. State, No. No. 32A01-9709-CR-287, 693 988 (Ind: Court of Appeals 1998).
291. Richards v. Barnhart, No. 05-CV-0528 (Dist. Crt, NY 2009).
292. Richardson v. Potter, No. CIVIL ACTION NO. 02-1831 (Dist. Crt, Louisiana 2006).
293. Rimbolt v. City of New Orleans, No. No. 862, 150 871 (La: Court of Appeals, 4th Circuit 1963).
294. Rodriguez v. Colvin, No. Civil Action No. 16-4322 (Dist. Court, ED Pennsylvania 2018).
295. Roe v. United States, No. No. 20-10329 (Court of Appeals, 5th Circuit 2020).
296. Roe v. United States, No. Case No. 3: 19-CV-792-C-BK (Dist. Court, ND Texas 2020).
297. Rogers v. Berryhill, No. C/A No. 1: 17-1317-TMC-SVH (Dist. Court, D. South Carolina 2018).
298. Rohrbough v. Hall, No. Case No. 4: 07CV00996 ERW (Dist. Court, ED Missouri 2008).
299. Rondeau v. Harris, No. CIVIL NO. H 78-641 (Dist. Crt, Conn 1980).
300. Roseboro v. Felts, No. Civil Action No. 5: 08-cv-01433 (Dist. Court, SD West Virginia 2012).
301. Ross v. Colvin, No. Case No. 1: 13CV1515 (Dist. Court, ND Ohio 2014).
302. Ruby N. v. Saul, No. Case No. 3: 20-CV-00037-TMB (Dist. Court, D. Alaska 2020).
303. Ruffino v. Archer, No. No. 3: 17-cv-00725 (Dist. Court, MD Tennessee 2018).
304. Ruggles v. Selby, No. Gen. No. 47,733, 165 733 (Ill: Appellate Court, 1st Dist., 3rd Div. 1960).
305. Ruhmer v. Wisconsin State Teachers Retirement Bd, No. No. 150, 180 542 (Wis: Supreme Court 1970).
306. Rutledge v. Berryhill, No. Case No. 18-cv-06601-JSC (Dist. Court, ND California 2019).
307. Ryan v. Armor Health, No. Case No. 17-C-1156 (Dist. Court, ED Wisconsin 2018).
308. Sacco v. Saul, No. Civil Action No. 19-19825 (FLW) (Dist. Court, D. New Jersey 2021).
309. Sandoval v. Secretary of Health and Human Services, No. No. 16-304V (Court of Federal Claims 2019).
310. Santana v. Union Hospital of the Bronx, No. 300 A.D.2d 56; 751 N.Y.S.2d 444; (Supreme Crt, NY 2002).

311. *Schneiderman v. Interstate Transit Lines, Inc*, 60 908 (1945).
312. *Schneiderman v. Interstate Transit Lines, Inc*, 394 569 (1946).
313. *Schoenhut v. Colvin*, No. Case No. 1: 15-CV-00341-REB (Dist. Court, D. Idaho 2017).
314. *Schroeder Iron Works v. IND. COM*, No. No. 39854, 224 233 (Ill: Supreme Court 1967).
315. *Scorza v. United States of America*, No. No. 86-CV-290 (Dist. Crt, NY 1988).
316. *Scroggins v. Fishing Tools, Inc*, No. No. 3986, 236 505 (La: Court of Appeals, 4th Circuit 1970).
317. *SCUILLA v. Commissioner of Social Security*, No. Case No. 2: 11-CV-629-FtM-29SPC (Dist. Court, MD Florida 2013).
318. *SEKONA v. HOLOWITZ*, No. No. 2: 16-cv-0608 CKD P (Dist. Court, ED California 2016).
319. *SEKONA v. Lizarraga*, No. No. 2: 17-cv-0346-KJM-EFB P (Dist. Court, ED California 2017).
320. *Serrano v. SAFAROV*, No. Docket No. 2016-50003, 2018 31107 (NY: Supreme Court, Dutchess 2018).
321. *Shaw v. ILLINOIS SPORTSERVICE, INC*, No. Case No. 19 C 8415 (Dist. Court, ND Illinois 2021).
322. *SHAWA v. City of Fairfield*, No. No. A133377 (Cal: Court of Appeal, 1st Appellate Dist., 1st Div. 2013).
323. *Shipley v. Colvin*, No. Case No. 3: 15CV708 (Dist. Court, ND Ohio 2016).
324. *Simmons v. Saul*, No. Civil Action No. 5: 19-2678-KDW (Dist. Court, D. South Carolina 2021).
325. *Sion v. Astrue*, No. Case No. 2: 12-cv-01323-GMN-GWF (Dist. Court, D. Nevada 2014).
326. *Smith v. Colvin*, No. No. CV 15-970 JCH/WPL (Dist. Court, D. New Mexico 2016).
327. *Snowden v. UNITED STATES DEPARTMENT OF VETERANS AFFAIRS*, No. Civil Action No. GLR-20-2913 (Dist. Court, D. Maryland 2021).
328. *Sokol v. Secretary of Health and Human Services*, No. No. 16-1631V (Court of Federal Claims 2020).
329. *St Elizabeth Hospital v Graham*, No. No. 09-93-253 CV (Crt of Appeals, Tx 1994).
330. *St. Elizabeth Hosp. v. Graham*, No. No. 09-93-253 CV, 883 433 (Tex: Court of Appeals, 9th Dist. 1994).
331. *STATE EX REL. SILZ v. Indus. Comm*, No. Case No. 03AP-749, 2004 4100 (Ohio: Court of Appeals, 10th Appellate Dist. 2004).
332. *State v. Allen*, No. No. W2008-00955-CCA-R3-CD (Tenn: Court of Criminal Appeals 2009).
333. *State v. Bunton*, No. No. 2 CA-CR 2011-0164, 279 1213 (Ariz: Court of Appeals, 2nd Div., Dept. A 2012).
334. *State v. Compton*, No. No. COA15-567 (NC: Court of Appeals 2015).
335. *State v. Harvey*, No. No. 10-CA-45, 2011 1201 (Ohio: Court of Appeals, 5th Appellate Dist. 2011).
336. *State v. Hill*, No. No. A-03-327 (Crt of Appeals, Nebraska 2004).
337. *State v. Killoren*, No. No. 29066, 285 38 (Mo: Court of Appeals, Eastern Dist. 1955).
338. *State v. Krueger*, No. No. E-06-072, 890 332 (Ohio: Court of Appeals, 6th Appellate Dist. 2008).

339. State v. Leming, 3 7 (Tenn: Court of Criminal Appeals 1998).
340. State v. Morin, No. No. 92-90-CA, 606 681 (RI: Supreme Court 1992).
341. State v. PHONGMANIVAN, No. No. 66858-7-I (Wash: Court of Appeals, 1st Div. 2013).
342. Susan N. v. KIJAKAZI, No. Case No. EDCV 20-1081-RAO (Dist. Court, CD California 2021).
343. SWENDRICK v. Commissioner of Social Security, No. Case No. 2: 16-cv-1177 (Dist. Court, SD Ohio 2018).
344. TAWA v. Gentry, No. No. 01-12-00407-CV (Tex: Court of Appeals, 1st Dist. 2013).
345. Taylor v. Berryhill, No. Case No. CIV-16-21-JHP-SPS (Dist. Court, ED Oklahoma 2017).
346. TERRANCE C. v. Saul, No. Case No. 3: 20-cv-00113-IM (Dist. Court, D. Oregon 2021).
347. Thornburg v. RAINBOW TRANSPORT, No. No. COA05-1279 (NC: Court of Appeals 2006).
348. Tillman v. VILLAGE OF WONDER LAKE, No. Case No. 16 CV 8293 (Dist. Court, ND Illinois 2018).
349. Toy v. Mackintosh, 222 430 (1916).
350. Tucker v. State Ind. Acc. Com, 337 979 (Or: Supreme Court 1959).
351. Turner v. Barnhart, No. No. 4: 01 CV 90659, 427 885 (Dist. Court, SD Iowa 2006).
352. TWOREK v. CAL. STATE TEACHERS'RETIREMENT SYSTEM BD, No. No. E057695 (Cal: Court of Appeal, 4th Appellate Dist., 2nd Div. 2014).
353. United States ex rel. Bryant v. Houston, 273 915 (1921).
354. United States ex rel. Konigsberg v. Vincent, No. No. 63, Docket 75-2028, 526 131 (Court of Appeals, 2nd Circuit 1975).
355. United States v. Asaro, No. No. 17-cr-127 (ARR) (Dist. Court, ED New York 2020).
356. United States v. Chun, No. Case No. 17-20451 (Dist. Court, ED Michigan 2019).
357. United States v. Clay, No. No. 3: 00CR221-MR (Dist. Court, WD North Carolina 2010).
358. United States v. Galloway, No. Criminal No. RDB-10-0775 (Dist. Court, D. Maryland 2020).
359. United States v. Kight, No. No. 1: 16-cr-99-WSD (Dist. Court, ND Georgia 2018).
360. United States v. Kight, No. No. 1: 16-cr-99-WSD (Dist. Court, ND Georgia 2018).
361. United States v. Kight, No. No. 1: 16-cr-99-WSD (Dist. Court, ND Georgia 2018).
362. United States v. Kight, No. No. 1: 16-cr-99-WSD (Dist. Court, ND Georgia 2018).
363. United States v. King, No. No. 75 Cr. 70 (MEF), 442 1244 (Dist. Court, SD New York 1978).
364. United States v. Mack, No. Case No. 3: 13-cr-206-J-32MCR (Dist. Court, MD Florida 2020).
365. United States v. Samas, No. No. 3: 18-cr-00296 (JAM) (Dist. Court, D. Connecticut 2021).

366. Universal City Development v. Williams, No. No. 5D07-832, 963 351 (Fla: Dist. Court of Appeals, 5th Dist. 2007).
367. Uris v. Gurney's Inn Corp, No. No. 71 C 1102, 405 744 (Dist. Court, ED New York 1975).
368. Valley Mould & Iron Co. v. Industrial Com, No. No. 53525, 419 1159 (Ill: Supreme Court 1981).
369. Viglio v. Viglio, No. FSTF A980166945S (Superior Crt, Conn 2008).
370. Vine v. COM., STATE EMPLOYEES'RETIREMENT, No. No. 49 MAP 2009, 9 1150 (Pa: Supreme Court 2010).
371. Vine v. STATE EMPLOYEES'RETIREMENT BD, No. No. 1937 CD 2007, 956 1088 (Pa: Commonwealth Court 2008).
372. Walters v. Smith, No. [No. 166, September Term, 1959.], 158 619 (Md: Court of Appeals 1960).
373. Ward v. State of Michigan, No. No. 86-74754 (Dist. Crt, Michigan 1989).
374. Ward v. Sternes, No. No. 02-3104, 334 696 (Court of Appeals, 7th Circuit 2003).
375. Wedgeworth v. Mixon, No. No. 15-686, 184 876 (La: Court of Appeals, 3rd Circuit 2016).
376. Wei-Ti Chen v. Secretary of Health and Human Services, No. No. 16-634V (Court of Federal Claims 2019).
377. WHW v Bristow, No. Record No. 1460-99-2 (Crt of Appeals, Va 2000).
378. WILLIAM G v. BETHANY CHRISTIAN SERVICES, No. Case No. 1: 08-cv-104 (Dist. Court, WD Michigan 2010).
379. Williams v. Colvin, No. Civil Action No. H-15-84 (Dist. Court, SD Texas 2016).
380. Williams v. International Paper Co, No. No. 98-6514, 227 706 (Court of Appeals, 6th Circuit 2000).
381. Wills v. Gregory, No. Court of Appeals Case No. 50A03-1706-JP-1477, 92 1133 (Ind: Court of Appeals 2018).
382. Wilson v. Catoosa Public Schools, No. No. 102,727, 157 1149 (Okla: Supreme Court 2007).
383. Wilson v. Colvin, No. Civil Action No. 9: 16-2213-CMC-BM (Dist. Court, D. South Carolina 2017).
384. Wise v. Industrial Com, No. No. 44870, 295 459 (Ill: Supreme Court 1973).
385. Wittkugel v. State of New York, 5 886 (NY: Court of Claims 1957).
386. Wright v. Alvarez, No. Case No. 3: 17-cv-665-J-39JRK (Dist. Court, MD Florida 2018).
387. Younce v. Heartland of Centerville, No. No. 26794, 65 192 (Ohio: Court of Appeals, 2nd Appellate Dist. 2016).
388. United States v. DeLeon, No. CR 15-4268 JB, 2017 3054511 (2017).
389. Young v. MEMORIAL HERMANN HOSPITAL SYSTEMS, No. Civil Action No. H-03-1859 (Dist. Court, SD Texas 2006).
